# Supplementary material for: Metabolic Profile in Early Pregnancy Is Associated with Offspring Adiposity at 4 Years of Age: The Rhea Pregnancy Cohort Crete, Greece
Source: PubMed Central journal article supplement (PMC4430416; doi:10.1371/journal.pone.0126327), 2015-05-13
Supplement: pone.0126327.s001.pdf [file pone.0126327.s001.pdf]

**S1 Table.** Maternal and child characteristics of participants and non-participants in the childhood follow up of the Rhea pregnancy cohort Crete, Greece

|                                                         | Participants<br>(n=698) | Non participants<br>(n=610) | <i>P</i> - value <sup>a</sup> |
|---------------------------------------------------------|-------------------------|-----------------------------|-------------------------------|
| <b>Maternal characteristics</b>                         |                         |                             |                               |
| Maternal age (years), <i>mean(SD)</i>                   | 29.83±4.8               | 28.88±5.2                   | <0.001                        |
| Maternal education, <i>n (%)</i>                        |                         |                             | <0.001                        |
| <i>Low</i>                                              | 117 (16.8)              | 153 (26.5)                  |                               |
| <i>Medium</i>                                           | 351 (50.3)              | 294 (51.0)                  |                               |
| <i>High</i>                                             | 230 (33.0)              | 130 (22.5)                  |                               |
| Mother's origin, <i>n (%)</i>                           |                         |                             | <0.001                        |
| <i>Greek</i>                                            | 660 (94.7)              | 516 (86.1)                  |                               |
| <i>Non greek</i>                                        | 37 (5.3)                | 83 (13.9)                   |                               |
| Smoking status, <i>n (%)</i>                            |                         |                             | <0.001                        |
| <i>Smoker</i>                                           | 218 (31.2)              | 226 (41.0)                  |                               |
| <i>Non-smoker</i>                                       | 480 (68.8)              | 325 (59.0)                  |                               |
| Parity, <i>n (%)</i>                                    |                         |                             | 0.065                         |
| <i>Primiparous</i>                                      | 304 (43.6)              | 217 (38.4)                  |                               |
| <i>Multiparous</i>                                      | 394 (56.4)              | 348 (61.6)                  |                               |
| Pre-pregnancy BMI (kg/m <sup>2</sup> ), <i>mean(SD)</i> | 24.51±4.8               | 23.69±4.6                   | <0.001                        |
| Pre-pregnancy BMI categories                            |                         |                             | 0.284                         |
| < 25 kg/m <sup>2</sup>                                  | 471 (67.5)              | 402 (70.3)                  |                               |
| ≥ 25 kg/m <sup>2</sup>                                  | 227 (32.5)              | 170 (29.7)                  |                               |
| Gestational weight gain (kg), <i>n (%)</i>              |                         |                             | 0.210                         |
| <i>Inadequate</i>                                       | 130 (22.1)              | 106 (25.2)                  |                               |
| <i>Adequate</i>                                         | 203 (34.5)              | 124 (29.5)                  |                               |
| <i>Excessive</i>                                        | 256 (43.5)              | 191 (45.4)                  |                               |
| Delivery type, <i>n (%)</i>                             |                         |                             | 0.888                         |
| <i>Vaginal</i>                                          | 350 (50.4)              | 303 (50.8)                  |                               |

|                                                  |            |            |        |
|--------------------------------------------------|------------|------------|--------|
| <i>Caesarean</i>                                 | 345 (49.6) | 294 (49.2) |        |
| <b>Child characteristics</b>                     |            |            |        |
| Child gender, <i>n (%)</i>                       |            |            | 0.239  |
| <i>Male</i>                                      | 362 (51.9) | 292 (48.6) |        |
| <i>Female</i>                                    | 336 (48.1) | 309 (51.4) |        |
| Breastfeeding duration (months), <i>mean(SD)</i> | 4.19±4.4   | 3.08±3.6   | <0.001 |
| Birth weight (kg), <i>mean(SD)</i>               | 3.21±0.4   | 3.14±0.5   | 0.016  |
| Gestational age (weeks), <i>mean(SD)</i>         | 38.24±1.5  | 38.21±1.6  | 0.971  |

<sup>a</sup> Statistically significant differences ( $p < 0.05$ ), based on Mann-Whitney U test for two independent samples and Pearson's  $\chi^2$  test for independence.
