# Supplementary material for: Metabolic Profile in Early Pregnancy Is Associated with Offspring Adiposity at 4 Years of Age: The Rhea Pregnancy Cohort Crete, Greece
Source: PubMed Central journal article supplement (PMC4430416; doi:10.1371/journal.pone.0126327), 2015-05-13
Supplement: pone.0126327.s002.pdf [file pone.0126327.s002.pdf]

**S2 Table.** Maternal and child characteristics of women who provided fasting blood samples in early pregnancy and those who did not in the Rhea pregnancy cohort Crete, Greece.

|                                                   | Fasting samples<br>(n=348) | Non fasting samples<br>(n=145) | P- value <sup>a</sup> |
|---------------------------------------------------|----------------------------|--------------------------------|-----------------------|
| <b>Maternal characteristics</b>                   |                            |                                |                       |
| Maternal age (years), mean (SD)                   | 29.90 (4.7)                | 30.50 (4.7)                    | 0.160                 |
| Maternal education, n( %)                         |                            |                                | 0.552                 |
| Low                                               | 58 (16.7)                  | 23 (15.9)                      |                       |
| Medium                                            | 178 (51.1)                 | 68 (46.9)                      |                       |
| High                                              | 112 (32.2)                 | 54 (37.2)                      |                       |
| Mother's origin, n (%)                            |                            |                                | 0.193                 |
| Greek                                             | 328 (94.2)                 | 132 (91.0)                     |                       |
| Non greek                                         | 20 (5.8)                   | 13 (9.0)                       |                       |
| Smoking status, n (%)                             |                            |                                | 0.178                 |
| Smoker                                            | 101 (29.0)                 | 51 (35.2)                      |                       |
| Non-smoker                                        | 247 (71.0)                 | 94 (64.8)                      |                       |
| Parity, n (%)                                     |                            |                                | 0.619                 |
| Primiparous                                       | 138 (39.7)                 | 61 (42.1)                      |                       |
| Multiparous                                       | 210 (60.3)                 | 84 (57.9)                      |                       |
| Pre-pregnancy BMI (kg/m <sup>2</sup> ), mean (SD) | 24.62 (4.8)                | 24.67 (4.8)                    | 0.957                 |
| Pre-pregnancy BMI categories                      |                            |                                | 0.768                 |
| < 25 kg/m <sup>2</sup>                            | 228 (65.5)                 | 97 (66.9)                      |                       |
| ≥ 25 kg/m <sup>2</sup>                            | 120 (34.5)                 | 48 (33.1)                      |                       |
| Gestational weight gain (kg), n (%)               |                            |                                | 0.204                 |
| Inadequate                                        | 67 (19.3)                  | 34 (23.4)                      |                       |
| Adequate                                          | 134 (38.5)                 | 62 (42.8)                      |                       |
| Excessive                                         | 147 (42.2)                 | 49 (33.8)                      |                       |
| Delivery type, n (%)                              |                            |                                | 0.564                 |
| Vaginal                                           | 166 (47.8)                 | 73 (50.7)                      |                       |
| Caesarean                                         | 181 (52.2)                 | 71 (49.3)                      |                       |
| <b>Child characteristics</b>                      |                            |                                |                       |
| Child gender, n (%)                               |                            |                                | 0.087                 |
| Male                                              | 195 (56.0)                 | 69 (47.6)                      |                       |
| Female                                            | 153 (44.0)                 | 76 (52.4)                      |                       |
| Breastfeeding duration (months), mean(SD)         | 4.26 (4.3)                 | 4.67 (4.6)                     | 0.586                 |
| Birth weight (kg), mean (SD)                      | 3.20 (0.4)                 | 3.24 (0.4)                     | 0.406                 |
| Gestational age (weeks), mean (SD)                | 38.25 (1.5)                | 38.39 (1.5)                    | 0.437                 |

<sup>a</sup> Statistically significant differences ( $p < 0.05$ ), based on Mann-Whitney U test for two independent samples and Pearson's  $\chi^2$  test for independence.
