# Supplementary material for: Metabolic Profile in Early Pregnancy Is Associated with Offspring Adiposity at 4 Years of Age: The Rhea Pregnancy Cohort Crete, Greece
Source: PubMed Central journal article supplement (PMC4430416; doi:10.1371/journal.pone.0126327), 2015-05-13
Supplement: pone.0126327.s004.pdf [file pone.0126327.s004.pdf]

**S4 Table.** Association of maternal pre-pregnancy obesity status with offspring cardiometabolic traits at 4 years of age, after excluding women with gestational diabetes (n=50), Rhea pregnancy cohort Crete, Greece.

|                                                    |     | Pre-pregnancy overweight/obese ( $\geq 25$ kg/m <sup>2</sup> ) |                                          |                                          |
|----------------------------------------------------|-----|----------------------------------------------------------------|------------------------------------------|------------------------------------------|
|                                                    |     | (n=209)                                                        |                                          |                                          |
| Offspring cardiometabolic traits at 4 years of age | n   | Model 1                                                        | Model 2                                  | Model 3                                  |
| <i>Adiposity outcomes</i>                          |     |                                                                |                                          |                                          |
|                                                    |     | <i>RR (95%CI)</i>                                              | <i>RR (95%CI)</i>                        | <i>RR (95%CI)</i>                        |
| Overweight/obese                                   | 122 | <b>1.65 (1.21, 2.26)</b>                                       | <b>1.57 (1.14, 2.18)</b>                 | 1.39 (0.98, 1.97)                        |
| WC (cm) $\geq$ 90th pct                            | 63  | <b>2.07 (1.32, 3.25)</b>                                       | <b>1.90 (1.19, 3.04)</b>                 | 1.51 (0.92, 2.46)                        |
|                                                    |     | <i><math>\beta</math>-coeff. (95%CI)</i>                       | <i><math>\beta</math>-coeff. (95%CI)</i> | <i><math>\beta</math>-coeff. (95%CI)</i> |
| Child BMI                                          | 568 | <b>0.81 (0.44, 1.17)</b>                                       | <b>0.78 (0.42, 1.14)</b>                 | <b>0.71 (0.32, 1.10)</b>                 |
| WC (cm)                                            | 556 | <b>1.77 (0.84, 2.70)</b>                                       | <b>1.76 (0.84, 2.68)</b>                 | <b>1.35 (0.45, 2.25)</b>                 |
| Sum of 4 Skinfolds (mm)                            | 551 | <b>5.52 (2.85, 8.19)</b>                                       | <b>5.05 (2.34, 7.78)</b>                 | <b>4.38 (1.42, 7.35)</b>                 |
| <i>Non-fasting lipid levels</i>                    |     |                                                                |                                          |                                          |
|                                                    |     | <i><math>\beta</math>-coeff. (95%CI)</i>                       | <i><math>\beta</math>-coeff. (95%CI)</i> | <i><math>\beta</math>-coeff. (95%CI)</i> |
| TC(mg/dl)                                          | 475 | 2.73 (-2.28, 7.74)                                             | 2.74 (-2.47, 7.96)                       | 1.84 (-3.87, 7.55)                       |
| HDL-C(mg/dl)                                       | 475 | 0.43 (-1.64, 2.50)                                             | 0.39 (-1.78, 2.55)                       | 0.22 (-2.13, 2.57)                       |
| <i>Blood pressure levels</i>                       |     |                                                                |                                          |                                          |
|                                                    |     | <i><math>\beta</math>-coeff. (95%CI)</i>                       | <i><math>\beta</math>-coeff. (95%CI)</i> | <i><math>\beta</math>-coeff. (95%CI)</i> |
| SBP percentiles                                    | 438 | 0.35 (-0.11, 0.81)                                             | 0.40 (-0.07, 0.88)                       | 0.32 (-0.16, 0.81)                       |
| DBP percentiles                                    | 438 | -0.02 (-0.46, 0.42)                                            | -0.07 (-0.51, 0.40)                      | -0.05 (-0.50, 0.40)                      |

BMI, Body Mass Index; WC, Waist Circumference; TC, Total Cholesterol; LDL-C, Low Density Lipoprotein Cholesterol; HDL-C, High Density Lipoprotein Cholesterol; SBP, Systolic Blood Pressure; DBP, Diastolic Blood Pressure; pct, percentile;

Model 1: adjusted for child sex.(except models using offspring systolic and diastolic blood pressure percentiles as an outcome)

---

Model 2: model 1 further adjusted for maternal age, education level, parity and smoking during pregnancy

Model 3: model 2 additionally adjusted for gestational weight gain, birth weight, breastfeeding duration, and TV watching at 4 years of age (hours/day). Models using offspring WC and sum of skinfolds as an outcome variable were also adjusted for child height, while those using offspring non-fasting lipid levels as an outcome were also adjusted for child BMI. Bold indicated statistically significant differences at  $p < 0.05$ .

---
