# Supplementary material for: Metabolic Profile in Early Pregnancy Is Associated with Offspring Adiposity at 4 Years of Age: The Rhea Pregnancy Cohort Crete, Greece
Source: PubMed Central journal article supplement (PMC4430416; doi:10.1371/journal.pone.0126327), 2015-05-13
Supplement: pone.0126327.s005.pdf [file pone.0126327.s005.pdf]

**S5 Table.** Association of maternal fasting lipid profile in early pregnancy with offspring cardiometabolic traits at 4 years of age, after excluding women with gestational diabetes (n=25), Rhea pregnancy cohort Crete, Greece.

| Offspring cardiometabolic traits at 4 years of age | n   | Fasting TC levels in early pregnancy<br>(per increase in 40 mg/dL)<br>(n=323) |                         |                          | Fasting LDL-C levels in early pregnancy<br>(per increase in 15 mg/dL)<br>(n=323) |                         |                          |
|----------------------------------------------------|-----|-------------------------------------------------------------------------------|-------------------------|--------------------------|----------------------------------------------------------------------------------|-------------------------|--------------------------|
|                                                    |     | Model 1                                                                       | Model 2                 | Model 3                  | Model 1                                                                          | Model 2                 | Model 3                  |
| <i>Adiposity outcomes</i>                          |     |                                                                               |                         |                          |                                                                                  |                         |                          |
|                                                    |     | <i>RR (95%CI)</i>                                                             | <i>RR (95%CI)</i>       | <i>RR (95%CI)</i>        | <i>RR (95%CI)</i>                                                                | <i>RR (95%CI)</i>       | <i>RR (95%CI)</i>        |
| Overweight/obese                                   | 59  | 1.18 (0.92, 1.53)                                                             | 1.23 (0.95, 1.61)       | 1.37 (0.99, 1.89)        | 1.05 (0.93, 1.19)                                                                | 1.06 (0.93, 1.21)       | 1.08 (0.92, 1.27)        |
| WC (cm) ≥ 90th pct                                 | 27  | 1.05 (0.71, 1.56)                                                             | 1.04 (0.70, 1.57)       | 1.24 (0.72, 2.11)        | 1.04 (0.86, 1.27)                                                                | 1.06 (0.86, 1.30)       | 1.11 (0.87, 1.41)        |
|                                                    |     | <i>β-coeff. (95%CI)</i>                                                       | <i>β-coeff. (95%CI)</i> | <i>β-coeff. (95%CI)</i>  | <i>β-coeff. (95%CI)</i>                                                          | <i>β-coeff. (95%CI)</i> | <i>β-coeff. (95%CI)</i>  |
| Child BMI                                          | 323 | 0.06 (-0.16, 0.29)                                                            | 0.08 (-0.16, 0.32)      | 0.03 (-0.22, 0.28)       | 0.01 (-0.10, 0.13)                                                               | 0.02 (-0.11, 0.16)      | -0.02 (-0.17, 0.12)      |
| WC (cm)                                            | 323 | 0.29 (-0.37, 0.95)                                                            | 0.30 (-0.42, 1.01)      | 0.42 (-0.26, 1.11)       | 0.10 (-0.25, 0.44)                                                               | 0.11 (-0.27, 0.50)      | 0.14 (-0.25, 0.53)       |
| Sum of 4 Skinfolts (mm)                            | 316 | 2.52 (0.78, 4.26)                                                             | 2.82 (0.98, 4.65)       | <b>3.19 (1.22, 5.15)</b> | 0.78 (-0.15, 1.71)                                                               | 0.85 (-0.15, 1.86)      | 1.05 (-0.02, 2.13)       |
| <i>Non-fasting lipid levels</i>                    |     | <i>β-coeff. (95%CI)</i>                                                       | <i>β-coeff. (95%CI)</i> | <i>β-coeff. (95%CI)</i>  | <i>β-coeff. (95%CI)</i>                                                          | <i>β-coeff. (95%CI)</i> | <i>β-coeff. (95%CI)</i>  |
| TC(mg/dl)                                          | 269 | <b>3.45 (0.10, 6.81)</b>                                                      | 3.44 (-0.12, 7.00)      | 3.68 (-0.38, 7.75)       | 2.28 (0.60, 3.96)                                                                | 2.20 (0.44, 3.95)       | <b>2.34 (0.22, 4.47)</b> |
| HDL-C(mg/dl)                                       | 269 | -0.47 (-1.89, 0.94)                                                           | -0.83 (-2.32, 0.67)     | -1.15 (-2.93, 0.62)      | -0.43 (-1.10, 0.24)                                                              | -0.68 (-1.28, 0.12)     | -0.70 (-1.56, 0.14)      |
| <i>Blood pressure levels</i>                       |     | <i>β-coeff. (95%CI)</i>                                                       | <i>β-coeff. (95%CI)</i> | <i>β-coeff. (95%CI)</i>  | <i>β-coeff. (95%CI)</i>                                                          | <i>β-coeff. (95%CI)</i> | <i>β-coeff. (95%CI)</i>  |
| SBP percentiles                                    | 259 | -0.08 (-0.42, 0.25)                                                           | -0.12 (-0.47, 0.23)     | -0.14 (-0.52, 0.24)      | -0.06 (-0.22, 0.10)                                                              | -0.08 (-0.25, 0.09)     | -0.09 (-0.27, 0.09)      |
| DBP percentiles                                    | 259 | -0.12 (-0.32, 0.08)                                                           | -0.16 (-0.36, 0.05)     | -0.16 (-0.39, 0.05)      | -0.04 (-0.14, 0.05)                                                              | -0.07 (-0.17, 0.03)     | -0.07 (-0.18, 0.03)      |

BMI, Body Mass Index; WC, Waist Circumference; TC, Total Cholesterol; LDL-C, Low Density Lipoprotein Cholesterol; HDL-C, High Density Lipoprotein Cholesterol; SBP, Systolic Blood Pressure; DBP, Diastolic Blood Pressure; pct, percentile;

Model 1: adjusted for child sex.(except models using offspring systolic and diastolic blood pressure percentiles as an outcome)

---

Model 2: model 1 further adjusted for maternal age, education level, parity, smoking during pregnancy and pre-pregnancy BMI

Model 3: model 2 additionally adjusted for gestational weight gain, birth weight, breastfeeding duration, and TV watching at 4 years of age (hours/day). Models using offspring WC and sum of skinfolds as an outcome variable were also adjusted for child height, while those using offspring non-fasting lipid levels as an outcome were also adjusted for child BMI. Bold indicated statistically significant differences at  $p < 0.05$
