# Supplementary material for: Metabolic Profile in Early Pregnancy Is Associated with Offspring Adiposity at 4 Years of Age: The Rhea Pregnancy Cohort Crete, Greece
Source: PubMed Central journal article supplement (PMC4430416; doi:10.1371/journal.pone.0126327), 2015-05-13
Supplement: pone.0126327.s006.pdf [file pone.0126327.s006.pdf]

**S6 Table.** Association of maternal blood pressure levels in early pregnancy with offspring cardiometabolic traits at 4 years of age, after excluding women with gestational diabetes (n=48), Rhea pregnancy cohort Crete, Greece

| Offspring cardiometabolic traits at 4 years of age | n   | SBP in early pregnancy<br>(per increase in 10 mm Hg)<br>(n=488) |                          |                          | DBP in early pregnancy<br>(per increase in 10 mm Hg)<br>(n=488) |                          |                          |
|----------------------------------------------------|-----|-----------------------------------------------------------------|--------------------------|--------------------------|-----------------------------------------------------------------|--------------------------|--------------------------|
|                                                    |     | Model 1                                                         | Model 2                  | Model 3                  | Model 1                                                         | Model 2                  | Model 3                  |
| <i>Adiposity outcomes</i>                          |     |                                                                 |                          |                          |                                                                 |                          |                          |
|                                                    |     | <i>RR (95%CI)</i>                                               | <i>RR (95%CI)</i>        | <i>RR (95%CI)</i>        | <i>RR (95%CI)</i>                                               | <i>RR (95%CI)</i>        | <i>RR (95%CI)</i>        |
| Overweight/obese                                   | 103 | <b>1.23 (1.04, 1.44)</b>                                        | <b>1.22 (1.04, 1.44)</b> | <b>1.22 (1.02, 1.45)</b> | <b>1.25 (1.06, 1.47)</b>                                        | <b>1.23 (1.04, 1.46)</b> | <b>1.23 (1.03, 1.47)</b> |
| WC (cm) ≥ 90th pct                                 | 54  | 1.22 (0.97, 1.54)                                               | 1.18 (0.93, 1.51)        | 1.07 (0.84, 1.36)        | 1.22 (0.96, 1.56)                                               | 1.18 (0.92, 1.53)        | 1.14 (0.88, 1.48)        |
|                                                    |     | <i>β-coeff. (95%CI)</i>                                         | <i>β-coeff. (95%CI)</i>  | <i>β-coeff. (95%CI)</i>  | <i>β-coeff. (95%CI)</i>                                         | <i>β-coeff. (95%CI)</i>  | <i>β-coeff. (95%CI)</i>  |
| Child BMI                                          | 462 | <b>0.18 (0.00, 0.36)</b>                                        | <b>0.18 (0.00, 0.35)</b> | 0.13 (-0.05, 0.32)       | 0.15 (-0.03, 0.33)                                              | 0.15 (-0.02, 0.32)       | 0.12 (-0.04, 0.30)       |
| WC (cm)                                            | 458 | <b>0.48 (0.05, 0.92)</b>                                        | <b>0.48 (0.05, 0.92)</b> | 0.27 (-0.13, 0.68)       | 0.44 (-0.02, 0.91)                                              | 0.40 (-0.05, 0.86)       | 0.32 (-0.05, 0.71)       |
| Sum of 4 Skinfolde (mm)                            | 451 | <b>1.85 (0.40, 3.30)</b>                                        | <b>1.74 (0.31, 3.18)</b> | 1.43 (-0.09, 2.95)       | <b>2.30 (1.02, 3.57)</b>                                        | <b>2.16 (0.93, 3.39)</b> | <b>1.93 (0.71, 3.16)</b> |
| <i>Non-fasting lipid levels</i>                    |     |                                                                 |                          |                          |                                                                 |                          |                          |
|                                                    |     | <i>β-coeff. (95%CI)</i>                                         | <i>β-coeff. (95%CI)</i>  | <i>β-coeff. (95%CI)</i>  | <i>β-coeff. (95%CI)</i>                                         | <i>β-coeff. (95%CI)</i>  | <i>β-coeff. (95%CI)</i>  |
| TC(mg/dl)                                          | 395 | -0.70 (-3.07, 1.67)                                             | -0.67 (-3.07, 1.72)      | -1.29 (-3.76, 1.17)      | -1.62 (-4.50, 1.25)                                             | -1.36 (-4.20, 1.47)      | -1.79 (-4.77, 1.19)      |
| HDL-C(mg/dl)                                       | 395 | 0.51 (-0.46, 1.48)                                              | 0.54 (-0.43, 1.51)       | 0.72 (-0.34, 1.79)       | -0.49 (-1.60, 0.62)                                             | -0.24 (-1.37, 0.88)      | -0.22 (-1.40, 0.95)      |
| <i>Blood pressure levels</i>                       |     |                                                                 |                          |                          |                                                                 |                          |                          |
|                                                    |     | <i>β-coeff. (95%CI)</i>                                         | <i>β-coeff. (95%CI)</i>  | <i>β-coeff. (95%CI)</i>  | <i>β-coeff. (95%CI)</i>                                         | <i>β-coeff. (95%CI)</i>  | <i>β-coeff. (95%CI)</i>  |
| SBP percentiles                                    | 360 | <b>0.18 (0.00, 0.37)</b>                                        | <b>0.19 (0.00, 0.38)</b> | <b>0.23 (0.02, 0.43)</b> | 0.20 (-0.01, 0.41)                                              | 0.17 (-0.04, 0.39)       | 0.17 (-0.04, 0.39)       |
| DBP percentiles                                    | 360 | 0.07 (-0.04, 0.19)                                              | 0.07 (-0.04, 0.19)       | 0.09 (-0.02, 0.21)       | 0.10 (-0.03, 0.23)                                              | 0.08 (-0.05, 0.21)       | 0.08 (-0.05, 0.21)       |

BMI, Body Mass Index; WC, Waist Circumference; TC, Total Cholesterol; LDL-C, Low Density Lipoprotein Cholesterol; HDL-C, High Density Lipoprotein Cholesterol;; SBP, Systolic Blood Pressure; DBP, Diastolic Blood Pressure; pct, percentile;

---

Model 1: adjusted for child sex.(except models using offspring systolic and diastolic blood pressure percentiles as an outcome)

Model 2: model 1 further adjusted for maternal age, education level, parity, smoking during pregnancy and pre-pregnancy BMI

Model 3: model 2 additionally adjusted for gestational weight gain, birth weight, breastfeeding duration, and TV watching at 4 years of age (hours/day). Models using offspring WC and sum of skinfolds as an outcome variable were also adjusted for child height, while those using offspring non-fasting lipid levels as an outcome were also adjusted for child BMI. Bold indicated statistically significant differences at  $p < 0.05$
